# Supplementary material
Source: PubMed Central journal article supplement (PMC7674043)
Supplement: AAC.01659-20-s0001.pdf [file AAC.01659-20-s0001.pdf]

**Figure S1. Alignment of the amino-acid sequences of PBP3.** The amino-acid sequences from the representative metallo-β-lactamase producing *E. coli* isolates analyzed in this study are shown. Colour key, red, ATM-AVI resistant (MIC of > 4 µg/ml), blue, ATM-AVI less susceptible (MIC of 2-4 µg/ml), green, ATM-AVI susceptible (MIC of ≤ 1 µg/ml).

```

1WT      DVFEPGSTVKPMVMTALQRGVVRENSVLNTVP----YRINGHEIKDVARYSELTLTGVL
R3058    DVFEPGSTVKPMVMTALQRGVVRENSVLNTIPYRINYRINGHEIKDVARYSKLTLTGVL
R461     DVFEPGSTVKPMVMTALQRGVVRENSVLNTIPYRINYRINGHEIKDVARYSKLTLTGVL
R3031    DVFEPGSTVKPMVMTALQRGVVRENSVLNTIPYRINYRINGHEIKDVARYSKLTLTGVL
N185     DVFEPGSTVKPMVMTALQRGVVRENSVLNTIPYRINYRINGHEIKDVARYSKLTLTGVL
N590     DVFEPGSTVKPMVMTALQRGVVRENSVLNTIPYRINYRINGHEIKDVARYSKLTLTGVL
N1013    DVFEPGSTVKPMVMTALQRGVVRENSVLNTIPYRINYRINGHEIKDVARYSKLTLTGVL
N1076    DVFEPGSTVKPMVMTALQRGVVRENSVLNTIPYRINYRINGHEIKDVARYSELTLTGVL
R460     DVFEPGSTVKPMVMTALQRGVVRENSVLNTIPYRINYRINGHEIKDVARYSELTLTGVL
R3033    DVFEPGSTVKPMVMTALQRGVVRENSVLNTIPYRINYRINGHEIKDVARYSKLTLTGVL
R3043    DVFEPGSTVKPMVMTALQRGVVRENSVLNTIPYRINYRINGHEIKDVARYSKLTLTGVL
R3029    DVFEPGSTVKPMVMTALQRGVVRENSVLNTIPYRINYRINGHEIKDVARYSKLTLTGVL
R3039    DVFEPGSTVKPMVMTALQRGVVRENSVLNTIPYRINYRINGHEIKDVARYSKLTLTGVL
R3048    DVFEPGSTVKPMVMTALQRGVVRENSVLNTIPYRINYRINGHEIKDVARYSKLTLTGVL
R3054    DVFEPGSTVKPMVMTALQRGVVRENSVLNTIPYRINYRINGHEIKDVARYSKLTLTGVL
N57      DVFEPGSTVKPMVMTALQRGVVRENSVLNTIPYRIKYRINGHEIKDVARYSELTLTGVL
R466     DVFEPGSTVKPMVMTALQRGVVRENSVLNTIPYRIKYRINGHEIKDVARYSELTLTGVL
R2222    DVFEPGSTVKPMVMTALQRGVVRENSVLNTIPYRIKYRINGHEIKDVARYSELPLTGVL
R474     DVFEPGSTVKPMVMTALQRGVVRENSVLNTIPYRINYRINGHEIKDVARYSELTLTGVL
N6       DVFEPGSTVKPMVMTALQRGVVRENSVLNTIPYRINYRINGHEIKDVARYSKLTLTGVL
N231     DVFEPGSTVKPMVMTALQRGVVRENSVLNTIPYRINYRINGHEIKDVARYSKLTLTGVL
N640     DVFEPGSTVKPMVMTALQRGVVRENSVLNTIPYRINYRINGHEIKDVARYSKLTLTGVL
R45      DVFEPGSTVKPMVMTALQRGVVRENSVLNTIPYRINYRINGHEIKDVARYSELTLTGVL
R467     DVFEPGSTVKPMVMTALQRGVVRENSVLNTIPYRINYRINGHEIKDXARYSELTLTGVY
R3056    DVFEPGSTVKPMVMTALQRGVVRENSVLNTIPYRINYRINGHEIKDVARYSKLTLTGVL
R449     DVFEPGSTVKPMVMTALQRGVVRENSVLNTIPYRIKYRINGHEIKDVARYSELTLTGVL
R464     DVFEPGSTVKPMVMTALQRGVVRENSVLNTIPYRIKYRINGHEIKDVARYSELTLTGVL
N8       DVFEPGSTVKPMVMTALQRGVVRENSVLNTIPYRINYRINGHEIKDVARYSELTLTGVL
N665     DVFEPGSTVKPMVMTALQRGVVRENSVLNTIPYRINYRINGHEIKDVARYSKLTLTGVL
N1146    DVFEPGSTVKPMVMTALQRGVVRENSVLNTIPYRINYRINGHEIKDVARYSKLTLTGVL
N689     DVFEPGSTVKPMVMTALQRGVVRENSVLNTIPYRINYRINGHEIKDVARYSKLTLTGVL
R74      DVFEPGSTVKPMVMTALQRGVVRENSVLNTIPYRINYRINGHEIKDVARYSKLTLTGVL
R456     DVFEPGSTVKPMVMTALQRGVVRENSVLNTIPYRINYRINGHEIKDVARYSELTLTGVL
R470     DVFEPGSTVKPMVMTALQRGVVRENSVLNTIPYRINYRINGHEIKDVARYSELTLTGVL
R2223    DVFEPGSTVKPMVMTALQRGVVRENSVLNTIPYRINYRINGHEIKDVARYSELTLTGVL
R450     DVFEPGSTVKPMVMTALQRGVVRENSVLNTIPYRINYRINGHEIKDVARYSKLTLTGVL
R451     DVFEPGSTVKPMVMTALQRGVVRENSVLNTIPYRINYRINGHEIKDVARYSELPLTGVL
R462     DVFEPGSTVKPMVMTALQRGVVRENSVLNTIPYRINYRINGHEIKDVARYSKLTLTGVL
N775     DVFEPGSTVKPMVMTALQRGVVRENSVLNTIPYRIKYRINGHEIKDVARYSELTLTGVL
N935     DVFEPGSTVKPMVMTALQRGVVRENSVLNTIPYRIKYRINGHEIKDVARYSELTLTGVL
N679     DVFEPGSTVKPMVMTALQRGVVRENSVLNTIPYRIKYRINGHEIKDVARYSELTLTGVL
R468     DVFEPGSTVKPMVMTALQRGVVRENSVLNTIPYRIKYRINGHEIKDVARYSELTLTGVL
R469     DVFEPGSTVKPMVMTALQRGVVRENSVLNTIPYRIKYRINGHEIKDVARYSELTLTGVL
N901     DVFEPGSTVKPMVMTALQRGVVRENSVLNTIPYRIKYRINGHEIKDVARYSELTLTGVL
N21      DVFEPGSTVKPMVMTALQRGVVRENSVLNTIPYRINYRINGHEIKDVARYSKLTLTGVL
R2758    DVFEPGSTVKPMVMTALQRGVVRENSVLNTIPYRINYRINGHEIKDVARYSELTLTGVY
N1014    DVFEPGSTVKPMVMTALQRGVVRENSVLNTIPYRINYRINGHEIKDVARYSKLTLTGVL
R475     DVFEPGSTVKPMVMTALQRGVVRENSVLNTIPYRINYRINGHEIKDVARYSKLTLTGVL
R2225    DVFEPGSTVKPMVMTALQRGVVRENSVLNTIPYRINYRINGHEIKDVARYSELTLTGVL
R3051    DVFEPGSTVKPMVMTALQRGVVRENSVLNTIPYRINYRINGHEIKDVARYSKLTLTGVL
N783     DVFEPGSTVKPMVMTALQRGVVRENSVLNTIPYRINYRINGHEIKDVARYSKLTLTGVL
R2839    DVFEPGSTVKPMVMTALQRGVVRENSVLNTIPYRINYRINGHEIKDVARYSKLTLTGVL
R472     DVFEPGSTVKPMVMTALQRGVVRENSVLNTIPYRINYRINGHEIKDVARYSKLTLTGVL

```

N489 DVFEPGSTVKPMVMTALQGGVRENSVLNTIPYRIKYRINGHEIKDVARYSELTLTGVL  
 N525 DVFEPGSTVKPMVMTALQGGVRENSVLNTIPYRIKYRINGHEIKDVARYSELTLTGVL  
 N442 DVFEPGSTVKPMVMTALQGGVRENSVLNTIPYRIPYRINGHEIKDVARYSELTLTGVL  
 N292 DVFEPGSTVKPMVMTALQGGVRENSVLNTIP----YRINGHEIKDVARYSELTLTGVL  
 N401 DVFEPGSTVKPMVMTALQGGVRENSVLNTIP----YRINGHEIKDVARYSELTLTGVL  
 R2574 DVFEPGSTVKPMVMTALQGGVRENSVLNTIP----YRINGHEIKDVARYSKLTLTGVL  
 N737 DVFEPGSTVKPMVMTALQGGVRENSVLNTIP----YRINGHEIKDVARYSELTLTGVL  
 N426 DVFEPGSTVKPMVMTALQGGVRENSVLNTIP----YRINGHEIKDVARYSELTLTGVL  
 N530 DVFEPGSTVKPMVMTALQGGVRENSVLNTIP----YRINGHEIKDVARYSELTLTGVL  
 N771 DVFEPGSTVKPMVMTALQGGVRENSVLNTIP----YRINGHEIKDVARYSELTLTGVL  
 R31 DVFEPGSTVKPMVMTALQGGVRENSVLNTIP----YRINGHEIKDVARYSELTLTGVL  
 R61 DVFEPGSTVKPMVMTALQGGVRENSVLNTIP----YRINGHEIKDVARYSELPLTGVL  
 R62 DVFEPGSTVKPMVMTALQGGVRENSVLNTIP----YRINGHEIKDVARYSELTLTGVL  
 R167 DVFEPGSTVKPMVMTALQGGVRENSVLNTIP----YRINGHEIKDVARYSELTLTGVL  
 R404 DVFEPGSTVKPMVMTALQGGVRENSVLNTIP----YRINGHEIKDVARYSELPLTGVL  
 R454 DVFEPGSTVKPMVMTALQGGVRENSVLNTIP----YRINGHEIKDVARYSELTLTGVL  
 R457 DVFEPGSTVKPMVMTALQGGVRENSVLNTIP----YRINGHEIKDVARYSELTLTGVL  
 R548 DVFEPGSTVKPMVMTALQGGVRENSVLNTIP----YRINGHEIKDVARYSELTLTGVL  
 R549 DVFEPGSTVKPMVMTALQGGVRENSVLNTIP----YRINGHEIKDVARYSELTLTGVL  
 R1688 DVFEPGSTVKPMVMTALQGGVRENSVLNTIP----YRINGHEIKDVARYSELTLTGVL  
 R553 DVFEPGSTVKPMVMTALQGGVRENSVLNTIP----YRINGHEIKDVARYSELTLTGVL  
 R550 DVFEPGSTVKPMVMTALQGGVRENSVLNTVP----YRINGHEIKDVARYSELTLTGVL  
 R551 DVFEPGSTVKPMVMTALQGGVRENSVLNTVP----YRINGHEIKDVARYSELPLTGVL  
 R552 DVFEPGSTVKPMVMTALQGGVRENSVLNTVP----YRINGHEIKDVARYSELTLTGVL  
 R554 DVFEPGSTVKPMVMTALQGGVRENSVLNTVP----YRINGHEIKDVARYSELTLTGVL  
 R465 DVFEPGSTVKPMVMTALQGGVRENSVLNTVP----YRINGHEIKDVARYSELTLTGVL  
 R471 DVFEPGSTVKPMVMTALQGGVRENSVLNTVP----YRINGHEIKDVARYSELTLTGVL  
 R2220 DVFEPGSTVKPMVMTALQGGVRENSVLNTVP----YRINGHEIKDVARYSELTLTGVL  
 R452 DVFEPGSTVKPMVMTALQGGVRENSVLNTVP----YRINGHEIKDVARYSELTLTGVL  
 R194 DVFEPGSTVKPMVMTALQGGVRENSVLNTVP----YRINGHEIKDVARYSELPLTGVL  
 R403 DVFEPGSTVKPMVMTALQGGVRENSVLNTVP----YRINGHEIXXVARYSELTLTGVL  
 R458 DVFEPGSTVKPMVMTALQGGVRENSVLNTVP----YRINGHEIKDVARYSELTLTGVL  
 R72 DVFEPGSTVKPMVMTALQGGVRENSVLNTVP----YRINGHEIKDVARYSELTLTGVL  
 N632 DVFEPGSTVKPMVMTALQGGVRENSVLNTVP----YRINGHEIKDVARYSELTLTGVL  
 R168 DVFEPGSTVKPMVMTALQGGVRENSVLNTVP----YRINGHEIKDVARYSELTLTGVL  
 R174 DVFEPGSTVKPMVMTALQGGVRENSVLNTVP----YRINGHEIKDVARYSELTLTGVL  
 R177 DVFEPGSTVKPMVMTALQGGVRENSVLNTVP----YRINGHEIKDVARYSELTLTGVL  
 N415 DVFEPGSTVKPMVMTALQGGVRENSVLNTVP----YRINGHEIKDVARYSELPLTGVL  
 R200 DVFEPGSTVKPMVMTALQGGVRENSVLNTVP----YRINGHEIKDVARYSELTLTGVL  
 R58 DVFEPGSTVKPMVMTALQGGVRENSVLXTVP----YRINGHEIKDVARYSELTLTGVL  
 N836 DVFEPGSTVKPMVMTALQGGVRENSVLNTVP----YRINGHEIKDVARYSELTLTGVL  
 \*\*\*\*\* \*:\* \*\*\*\*\* \*:\* \*\*\*
